# Supplementary material for: The Influence of Short Motifs on the Anticancer Activity of HB43 Peptide
Source: MDPI journal article supplement (doi:10.3390/pharmaceutics14051089), 2022-05-19
Supplement: s1 [file s1]

# The Influence of Short Motifs on the Anticancer Activity of HB43 Peptide

**Claudia Herrera-León<sup>1</sup>, Francisco Ramos-Martín<sup>1</sup>, Hassan El Btaouri<sup>2</sup>, Viviane Antonietti<sup>3</sup>, Pascal Sonnet<sup>3</sup>, Laurent Martiny<sup>2</sup>, Fabrizia Zevolini<sup>4</sup>, Chiara Falciani<sup>4</sup>, Catherine Sarazin<sup>1</sup> and Nicola D'Amelio<sup>1,\*</sup>**

<sup>1</sup> Unité de Génie Enzymatique et Cellulaire UMR 7025 CNRS, Université de Picardie Jules Verne, 80039 Amiens, France; claudia.herrera@u-picardie.fr (C.H.-L.); francisco.ramos@u-picardie.fr (F.R.-M.); catherine.sarazin@u-picardie.fr (C.S.)

<sup>2</sup> Matrice Extracellulaire et Dynamique Cellulaire UMR 7369 CNRS, Université de Reims Champagne Ardenne (URCA), 51100 Reims, France; hassan.elbtaouri@univ-reims.fr (H.E.B.); laurent.martiny@univ-reims.fr (L.M.)

<sup>3</sup> Agents Infectieux, Résistance et Chimiothérapie, AGIR UR 4294, Université de Picardie Jules Verne, UFR de Pharmacie, 80037 Amiens, France; viviane.silva-pires@u-picardie.fr (V.A.); pascal.sonnet@u-picardie.fr (P.S.)

<sup>4</sup> Department of Medical Biotechnology, University of Siena, 53100 Siena, Italy; fabrizia.zevolini@student.unisi.it (F.Z.); chiara.falciani@unisi.it (C.F.)

\* Correspondence: nicola.damelio@u-picardie.fr; Tel.: +33-3-22-82-74-73; Fax: +33-3-22-82-75

**Motifs:**  
Position-independent probability to find a residue type at a certain distance from a reference residue type

e.g. if an Alanine (A) is present one peptide of the family, the graph relative to A reports on the probability to find each residue type n positions (or regions) apart.

A  
R  
Q  
D  
C  
G  
E  
H  
I  
L  
K  
M  
P  
S  
T  
W  
Y  
V

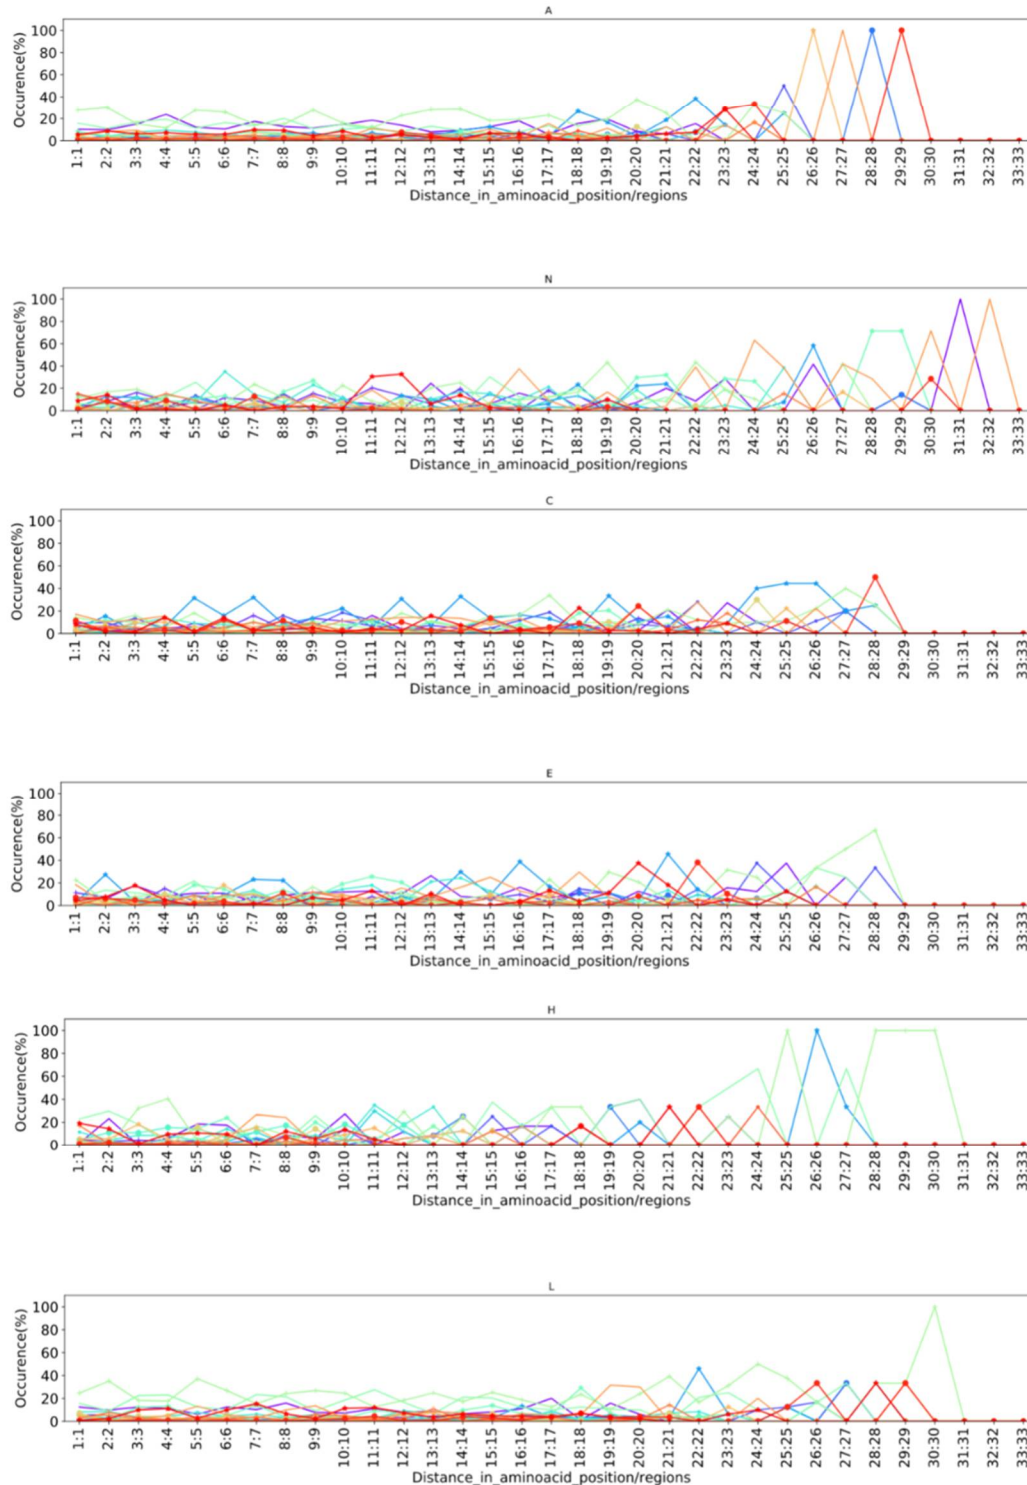

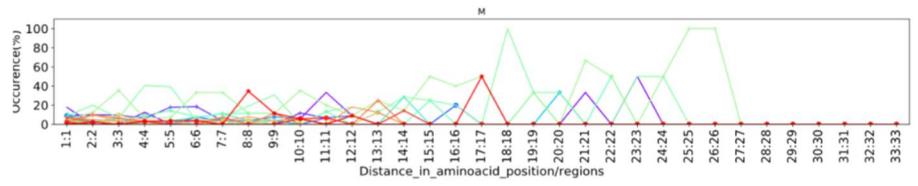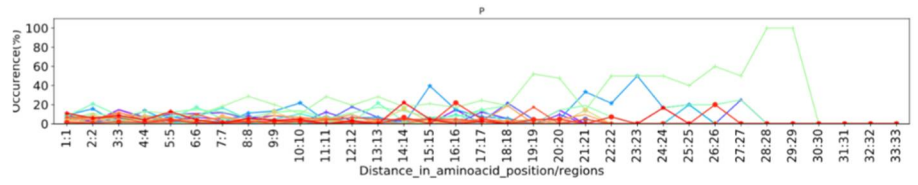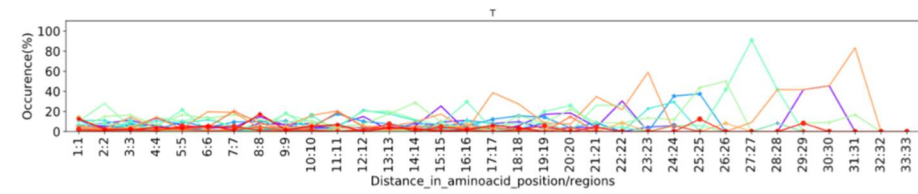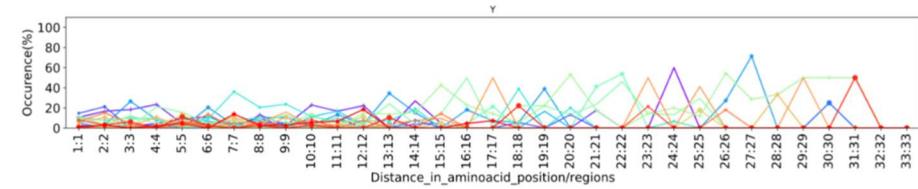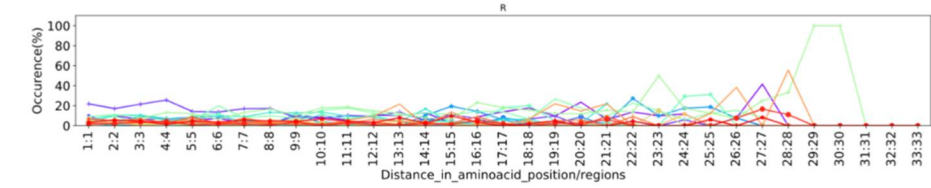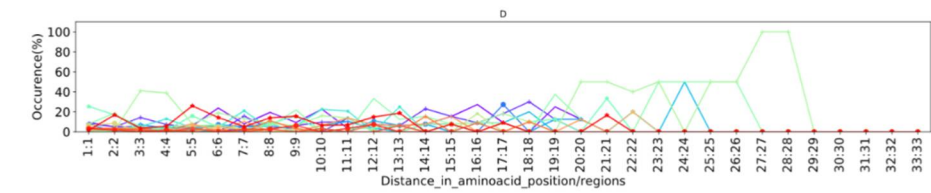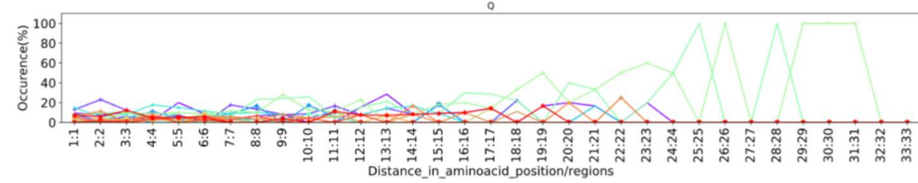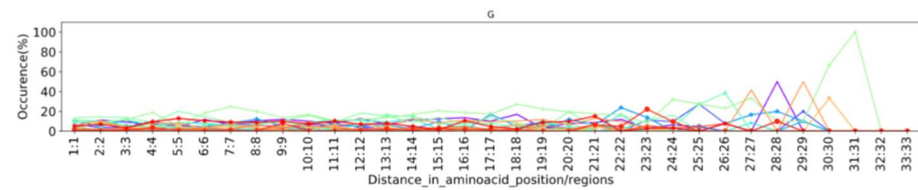

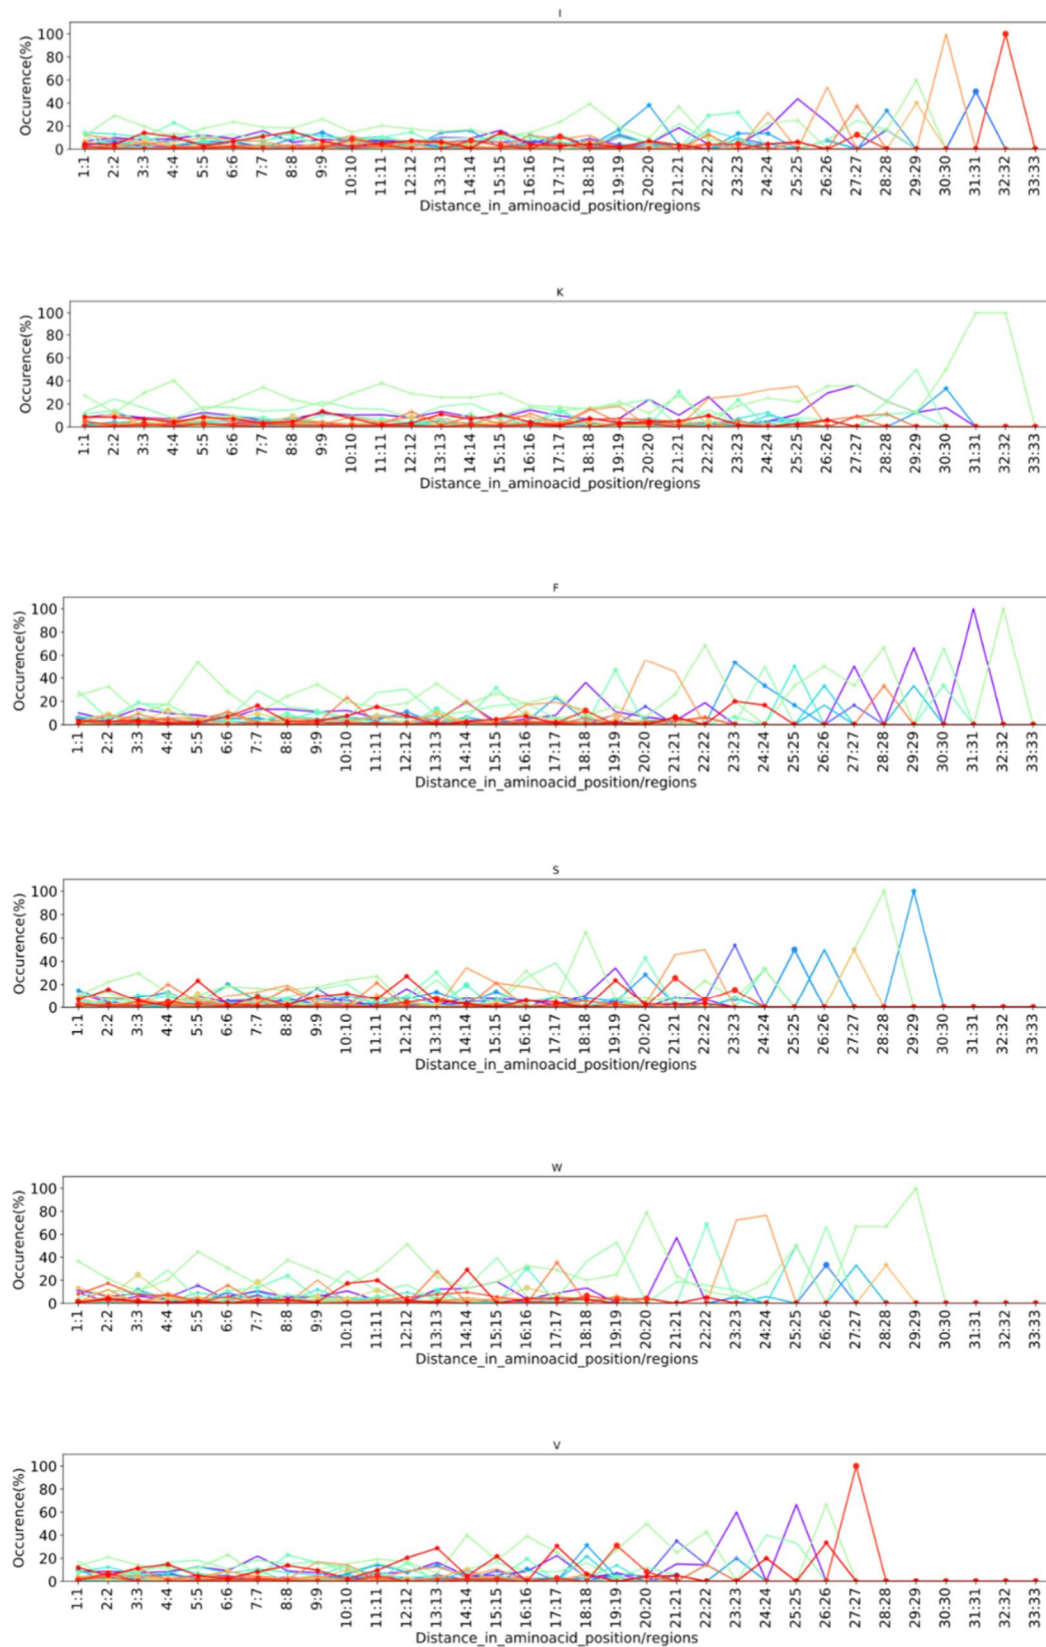

**Figure S1.** Analysis of the amino acid composition of HB43-related family generated by ADAPTABLE web server.

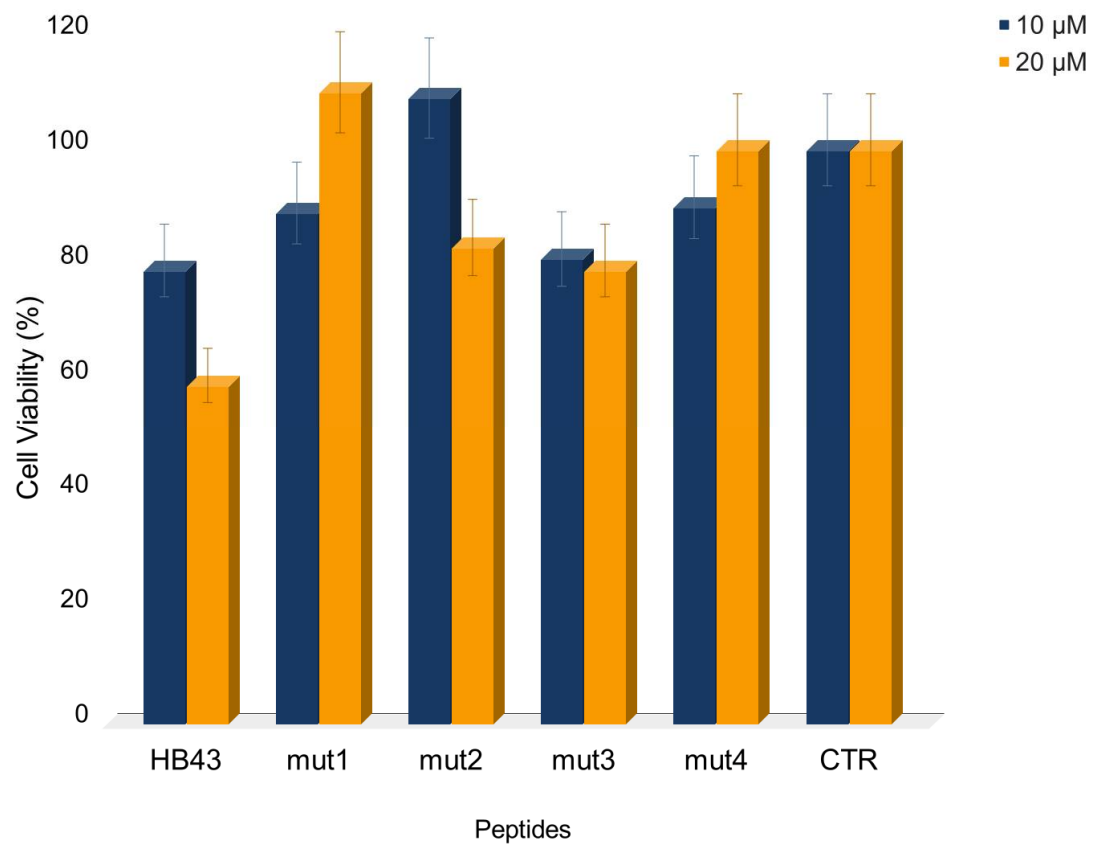

**Figure S2.** Cell viability of MDA-MB 231 breast cancer cells treated with HB43 and mutants.

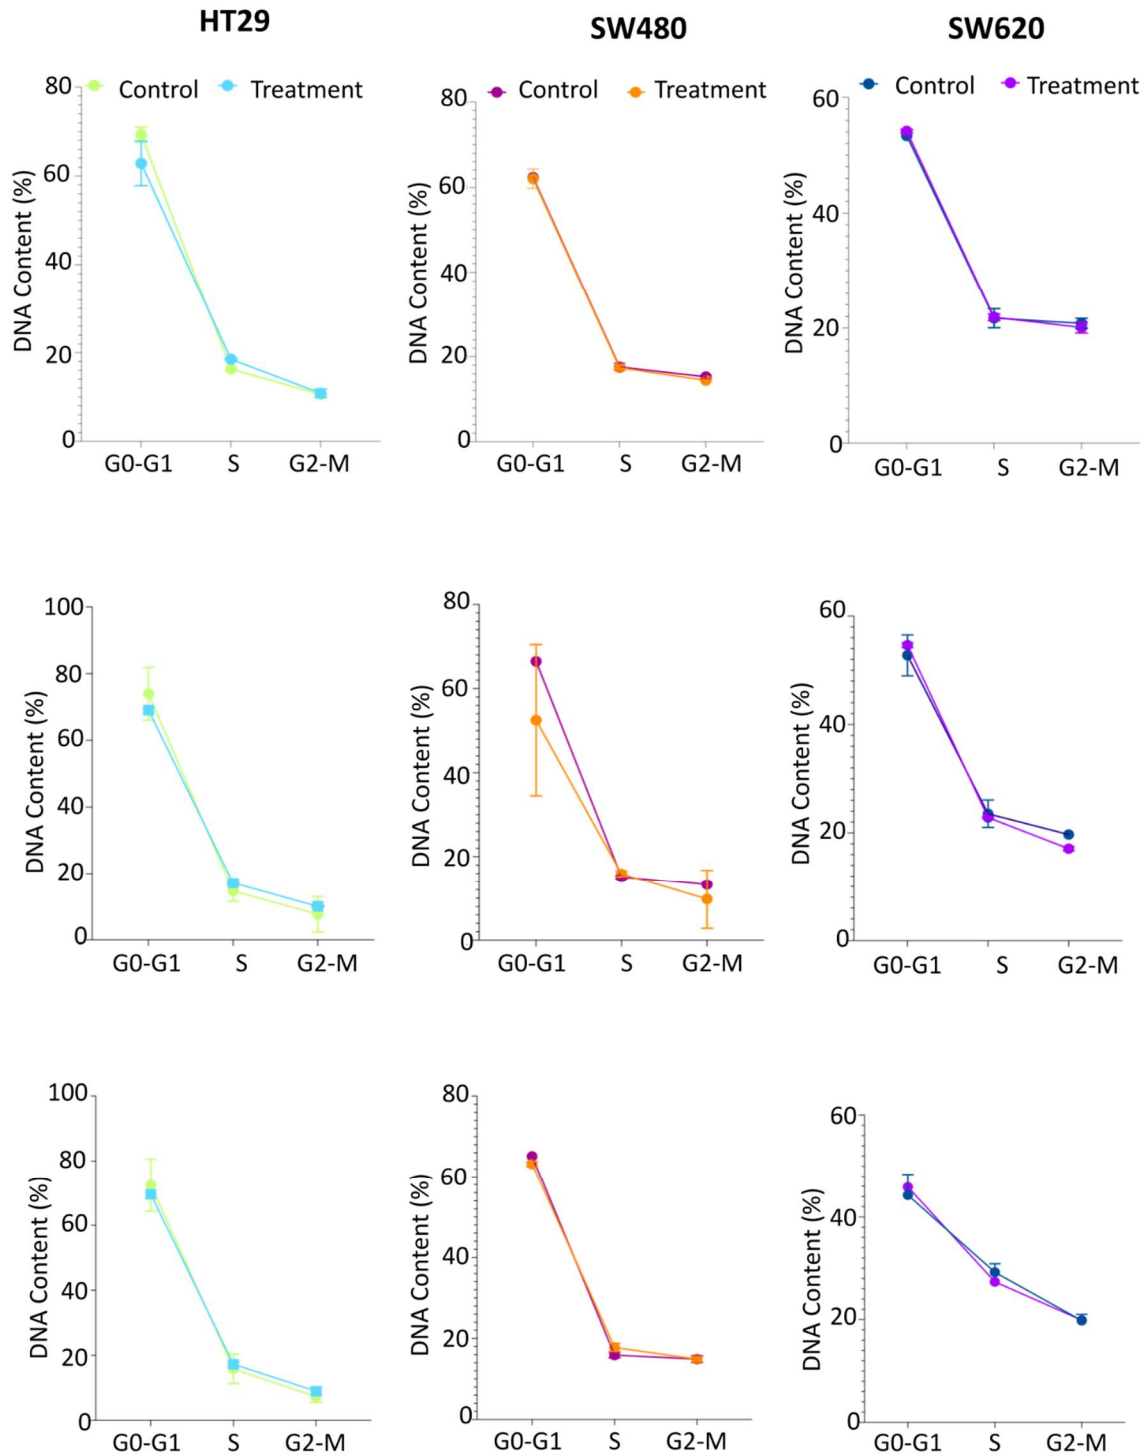

**Figure S3.** Analysis of cell percentages in each cell cycle phase for colon cancer cells under study, HT29 (**left**), SW480 (**center**), and SW620 (**right**). Cells were treated with peptides HB43/*mut3* (5  $\mu$ M), *mut2* (20  $\mu$ M) and incubated for 12 h. Each data point is expressed as mean  $\pm$  SD (n = 2).

**Table S1.**  $^1\text{H}$  and  $^{13}\text{C}$  NMR assignment of *mut3* 0.8 mM in 10 mM phosphate buffer pH 6.6, 10%  $\text{D}_2\text{O}$ , 278 K

|                 | <b>Phe 1</b>        | <b>Ala 2</b>     | <b>Lys 3</b>           | <b>Leu 4</b>           | <b>Leu 5</b>       | <b>Ala 6</b>       | <b>Lys 7</b>       |
|-----------------|---------------------|------------------|------------------------|------------------------|--------------------|--------------------|--------------------|
| $^1\text{H}$    | NH=X                | NH= 8.47         | NH= 8.62               | NH= 8.59               | NH= 8.41           | NH= 8.55           | NH= 8.54           |
|                 | $\alpha$ =4.19      | $\alpha$ = 4.33  | $\alpha$ = 4.24        | $\alpha$ = 4.33        | $\alpha$ = 4.33    | $\alpha$ = 4.27    | $\alpha$ = 4.24    |
|                 | $\beta_1$ = 3.1     | $\beta$ = 1.37   | $\beta_1$ = 1.79       | $\beta$ = 1.63         | $\beta$ = 1.63     | $\beta$ = 1.39     | $\beta_1$ = 1.79   |
|                 | $\beta_2$ = 3.25    |                  | $\beta_2$ = 1.79       | $\gamma$ = 1.66        | $\gamma$ = 1.66    |                    | $\beta_2$ = 1.79   |
|                 | $\delta$ = 7.30     |                  | $\gamma$ = 1.48        | $\delta_1$ = 0.96      | $\delta_1$ = 0.96  |                    | $\gamma$ = 1.48    |
|                 | $\epsilon$ = 7.41   |                  | $\delta$ = 1.71        | $\delta_2$ = 0.89      | $\delta_2$ = 0.89  |                    | $\delta$ = 1.71    |
|                 | $\zeta$ = 7.38      |                  | $\epsilon$ = 3.00      |                        |                    |                    | $\epsilon$ = 3.00  |
| $^{13}\text{C}$ | $\alpha$ =57.22     | $\alpha$ = 52.66 | $\alpha$ = 56.64       | $\alpha$ = 55.09       | $\alpha$ = 55.09   | $\alpha$ = 52.64   | $\alpha$ = 56.64   |
|                 | $\beta$ = 40.2      | $\beta$ = 19.41  | $\beta$ = 33.23        | $\beta$ = 42.34        | $\beta$ = 42.34    | $\beta$ = 19.26    | $\beta$ = 33.23    |
|                 | $\delta$ = 132.36   |                  | $\gamma$ = 25.08       | $\gamma$ = 26.99       | $\gamma$ = 26.99   |                    | $\gamma$ = 25.08   |
|                 | $\epsilon$ = 131.98 |                  | $\delta$ = 29.35       | $\delta_1$ = 25.13     | $\delta_1$ = 25.13 |                    | $\delta$ = 29.35   |
|                 | $\zeta$ = 130.78    |                  | $\epsilon$ = 42.11     | $\delta_2$ = 23.45     | $\delta_2$ = 23.45 |                    | $\epsilon$ = 42.11 |
|                 | <b>Leu 8</b>        | <b>Ala 9</b>     | <b>Arg 10</b>          | <b>Arg 11</b>          | <b>Leu 12</b>      | <b>Leu 13</b>      |                    |
| $^1\text{H}$    | NH= 8.51            | NH= 8.72         | NH= 8.50               | NH= 8.60               | NH= 8.61           | NH= 8.43           |                    |
|                 | $\alpha$ = 4.33     | $\alpha$ = 4.33  | $\alpha$ = 4.29        | $\alpha$ = 4.29        | $\alpha$ = 4.33    | $\alpha$ = 4.33    |                    |
|                 | $\beta$ = 1.63      | $\beta$ = 1.39   | $\beta_2$ = 1.81       | $\beta_2$ = 1.81       | $\beta$ = 1.634    | $\beta$ = 1.63     |                    |
|                 | $\gamma$ = 1.66     |                  | $\beta_3$ = 1.81       | $\beta_3$ = 1.81       | $\gamma$ = 1.66    | $\gamma$ = 1.66    |                    |
|                 | $\delta_1$ = 0.96   |                  | $\gamma$ = 1.66        | $\gamma$ = 1.66        | $\delta_1$ = 0.96  | $\delta_1$ = 0.96  |                    |
|                 | $\delta_2$ = 0.89   |                  | $\delta$ = 3.21        | $\delta$ = 3.21        | $\delta_2$ = 0.89  | $\delta_2$ = 0.89  |                    |
|                 |                     |                  | NH <sub>1</sub> = 7.01 | NH <sub>1</sub> = 7.68 |                    |                    |                    |
|                 |                     |                  | NH <sub>2</sub> = 6.56 | NH <sub>2</sub> = 6.27 |                    |                    |                    |
| $^{13}\text{C}$ | $\alpha$ = 55.09    | $\alpha$ = 52.37 | $\alpha$ = 56.45       | $\alpha$ = 56.45       | $\alpha$ = 55.09   | $\alpha$ = 55.09   |                    |
|                 | $\beta$ = 42.34     | $\beta$ = 19.26  | $\beta$ = 30.82        | $\beta$ = 30.82        | $\beta$ = 42.34    | $\beta$ = 42.34    |                    |
|                 | $\gamma$ = 26.99    |                  | $\gamma$ = 27.43       | $\gamma$ = 27.43       | $\gamma$ = 26.99   | $\gamma$ = 26.99   |                    |
|                 | $\delta_1$ = 25.13  |                  | $\delta$ = 43.45       | $\delta$ = 43.45       | $\delta_1$ = 25.13 | $\delta_1$ = 25.13 |                    |
|                 | $\delta_2$ = 23.45  |                  |                        |                        | $\delta_2$ = 23.45 | $\delta_2$ = 23.45 |                    |

**Table S2.**  $^1\text{H}$  NMR assignment of *mut3* 0.8 mM (90% 10 mM phosphate buffer at pH 6.6, 10%  $\text{D}_2\text{O}$ ) in the presence of 50 mM DPC micelles at 278 K

| Phe 1             | Ala 2           | Lys 3               | Leu 4               | Leu 5             | Ala 6             | Lys 7            |
|-------------------|-----------------|---------------------|---------------------|-------------------|-------------------|------------------|
| NH=X              | NH= 7.9         | NH= 8.79            | NH= 7.94            | NH= 8.18          | NH= 8.24          | NH= 7.79         |
| $\alpha$ =3.98    | $\alpha$ = 3.92 | $\alpha$ = 4.05     | $\alpha$ = 4.16     | $\alpha$ = 4.19   | $\alpha$ = 4.04   | $\alpha$ = 4.03  |
| $\beta_1$ = 3.13  | $\beta$ = 1.43  | $\beta_1$ = 1.85    | $\beta$ = 1.82      | $\beta$ = 1.72    | $\beta$ = 1.55    | $\beta_1$ = 2.01 |
| $\beta_2$ = 3.14  |                 | $\beta_2$ = 1.85    | $\gamma$ = 1.47     | $\gamma$ = 1.50   |                   | $\beta_2$ = 2.01 |
| $\delta$ = 7.27   |                 | $\gamma$ = 1.45     | $\delta_1$ = 0.91   | $\delta_1$ = 0.91 |                   | $\gamma$ = 1.55  |
| $\epsilon$ = 7.32 |                 | $\delta$ = 1.60     | $\delta_2$ = 0.91   | $\delta_2$ = 0.91 |                   | $\delta$ = 1.70  |
| $\zeta$ = ?       |                 | $\epsilon$ = 3.30   |                     |                   |                   | $\epsilon$ = ?   |
| Leu 8             | Ala 9           | Arg 10              | Arg 11              | Leu 12            | Leu 13            |                  |
| NH= 8.28          | NH= 8.75        | NH= 8.14            | NH= 7.79            | NH= 8.14          | NH= 8.01          |                  |
| $\alpha$ = 4.06   | $\alpha$ = 3.92 | $\alpha$ = 4.16     | $\alpha$ = 4.17     | $\alpha$ = 4.17   | $\alpha$ = 4.14   |                  |
| $\beta$ = 1.79    | $\beta$ = 1.51  | $\beta_2$ = ?       | $\beta_2$ = ?       | $\beta$ = 1.86    | $\beta$ = 1.84    |                  |
| $\gamma$ = 1.49   |                 | $\beta_3$ = ?       | $\beta_3$ = ?       | $\gamma$ = 1.51   | $\gamma$ = 1.55   |                  |
| $\delta_1$ = 0.92 |                 | $\gamma$ = ?        | $\gamma$ = ?        | $\delta_1$ = 0.95 | $\delta_1$ = 0.92 |                  |
| $\delta_2$ = 0.97 |                 | $\delta$ = ?        | $\delta$ = ?        | $\delta_2$ = 0.91 | $\delta_2$ = 0.92 |                  |
|                   |                 | NH <sub>1</sub> = ? | NH <sub>1</sub> = ? |                   |                   |                  |
|                   |                 | NH <sub>2</sub> = ? | NH <sub>2</sub> = ? |                   |                   |                  |

Missing values are due to overlap or exchange with the solvent (exchangeable protons). Severe broadening is observed for lysine and arginine side chains preventing their full assignment.



**Table S3.**  $^1\text{H}$  and  $^{13}\text{C}$  NMR assignment of *mut4* 0.8 mM in 10 mM phosphate buffer pH 6.6, 10%  $\text{D}_2\text{O}$ , 278 K

|                 | Ala 1              | Ala 2            | Lys 3              | Leu 4              | Leu 5              | Ala 6              | Lys 7              |
|-----------------|--------------------|------------------|--------------------|--------------------|--------------------|--------------------|--------------------|
| $^1\text{H}$    | NH= X              | NH= 8.80         | NH= 8.72           | NH= 8.47           | NH= 8.58           | NH= 8.47           | NH= 8.55           |
|                 | $\alpha$ = 4.07    | $\alpha$ = 4.31  | $\alpha$ = 4.25    | $\alpha$ = 4.35    | $\alpha$ = 4.35    | $\alpha$ = 4.30    | $\alpha$ = 4.28    |
|                 | $\beta$ = 1.53     | $\beta$ = 1.39   | $\beta_1$ = 1.78   | $\beta$ = 1.62     | $\beta$ = 1.62     | $\beta$ = 1.39     | $\beta_1$ = 1.73   |
|                 |                    |                  | $\beta_2$ = 1.78   | $\gamma$ = 1.66    | $\gamma$ = 1.66    |                    | $\beta_2$ = 1.73   |
|                 |                    |                  | $\gamma$ = 1.47    | $\delta_1$ = 0.95  | $\delta_1$ = 0.95  |                    | $\gamma$ = 1.46    |
|                 |                    |                  | $\delta$ = 1.70    | $\delta_2$ = 0.89  | $\delta_2$ = 0.89  |                    | $\delta$ = 1.70    |
|                 |                    |                  | $\epsilon$ = 3.01  |                    |                    |                    | $\epsilon$ = 3.01  |
| $^{13}\text{C}$ | $\alpha$ = 51.79   | $\alpha$ = 52.58 | $\alpha$ = 56.73   | $\alpha$ = 55.07   | $\alpha$ = 55.35   | $\alpha$ = 52.65   | $\alpha$ = 56.62   |
|                 | $\beta$ = 19.72    | $\beta$ = 19.37  | $\beta$ = 33.43    | $\beta$ = 42.53    | $\beta$ = 42.53    | $\beta$ = 19.37    | $\beta$ = 33.31    |
|                 |                    |                  | $\gamma$ = 25.08   | $\gamma$ = 27.20   | $\gamma$ = 27.20   |                    | $\gamma$ = 25.08   |
|                 |                    |                  | $\delta$ = 29.42   | $\delta_1$ = 25.07 | $\delta_1$ = 25.07 |                    | $\delta$ = 29.42   |
|                 |                    |                  | $\epsilon$ = 42.26 | $\delta_2$ = 23.66 | $\delta_2$ = 23.66 |                    | $\epsilon$ = 42.26 |
|                 | Leu 8              | Ala 9            | Lys 10             | Lys 11             | Leu 12             | Leu 13             |                    |
| $^1\text{H}$    | NH= 8.58           | NH= 8.67         | NH= 8.56           | NH= 8.45           | NH= 8.52           | NH= 8.49           |                    |
|                 | $\alpha$ = 4.35    | $\alpha$ = 4.26  | $\alpha$ = 4.26    | $\alpha$ = 4.26    | $\alpha$ = 4.36    | $\alpha$ = 4.33    |                    |
|                 | $\beta$ = 1.62     | $\beta$ = 1.39   | $\beta_1$ = 1.78   | $\beta_1$ = 1.78   | $\beta$ = 1.62     | $\beta$ = 1.62     |                    |
|                 | $\gamma$ = 1.66    |                  | $\beta_2$ = 1.78   | $\beta_2$ = 1.78   | $\gamma$ = 1.66    | $\gamma$ = 1.66    |                    |
|                 | $\delta_1$ = 0.95  |                  | $\gamma$ = 1.47    | $\gamma$ = 1.47    | $\delta_1$ = 0.95  | $\delta_1$ = 0.95  |                    |
|                 | $\delta_2$ = 0.89  |                  | $\delta$ = 1.70    | $\delta$ = 1.70    | $\delta_2$ = 0.89  | $\delta_2$ = 0.89  |                    |
|                 |                    |                  | $\epsilon$ = 3.01  | $\epsilon$ = 3.01  |                    |                    |                    |
| $^{13}\text{C}$ | $\alpha$ = 55.35   | $\alpha$ = 52.65 | $\alpha$ = 56.61   | $\alpha$ = 56.49   | $\alpha$ = 55.10   | $\alpha$ = 55.21   |                    |
|                 | $\beta$ = 42.53    | $\beta$ = 19.37  | $\beta$ = 33.31    | $\beta$ = 33.43    | $\beta$ = 42.53    | $\beta$ = 42.53    |                    |
|                 | $\gamma$ = 27.204  |                  | $\gamma$ = 25.08   | $\gamma$ = 25.08   | $\gamma$ = 27.20   | $\gamma$ = 27.20   |                    |
|                 | $\delta_1$ = 25.07 |                  | $\delta$ = 29.42   | $\delta$ = 29.42   | $\delta_1$ = 25.07 | $\delta_1$ = 25.07 |                    |
|                 | $\delta_2$ = 23.66 |                  | $\epsilon$ = 42.26 | $\epsilon$ = 42.26 | $\delta_2$ = 23.66 | $\delta_2$ = 23.66 |                    |

**Table S4.**  $^1\text{H}$  NMR assignment of *mut4* 0.8 mM (90% 10 mM phosphate buffer at pH 6.6, 10%  $\text{D}_2\text{O}$ ) in the presence of 50 mM DPC micelles at 278 K

| Ala 1             | Ala 2           | Lys 3            | Leu 4            | Leu 5             | Ala 6             | Lys 7            |
|-------------------|-----------------|------------------|------------------|-------------------|-------------------|------------------|
| NH= X             | NH= 8.12        | NH= 8.8          | NH= 8.39         | NH= 8.32          | NH= 8.32          | NH= 7.89         |
| $\alpha$ = 4.13   | $\alpha$ = 4.06 | $\alpha$ = 4.16  | $\alpha$ = 4.14  | $\alpha$ = 4.06   | $\alpha$ = 4.09   | $\alpha$ = 4.05  |
| $\beta$ = 1.52    | $\beta$ = 1.53  | $\beta_1$ = 1.91 | $\beta$ = 1.87   | $\beta$ = 1.85    | $\beta$ = 1.54    | $\beta_1$ = 2.04 |
|                   |                 | $\beta_2$ = 1.91 | $\gamma$ = 1.68  | $\gamma$ = ?      |                   | $\beta_2$ = 2.04 |
|                   |                 | $\gamma$ = 1.51  | $\delta_1$ = ?   | $\delta_1$ = 0.92 |                   | $\gamma$ = 1.53  |
|                   |                 | $\delta$ = 1.71  | $\delta_2$ = ?   | $\delta_2$ = 0.92 |                   | $\delta$ = 1.70  |
|                   |                 | $\epsilon$ = ?   |                  |                   |                   | $\epsilon$ = ?   |
| Leu 8             | Ala 9           | Lys 10           | Lys 11           | Leu 12            | Leu 13            |                  |
| NH= 8.32          | NH= 8.63        | NH= 7.95         | NH= 7.75         | NH= 8.09          | NH= 7.99          |                  |
| $\alpha$ = 4.06   | $\alpha$ = 3.93 | $\alpha$ = 3.97  | $\alpha$ = 4.13  | $\alpha$ = 4.16   | $\alpha$ = 4.27   |                  |
| $\beta$ = 1.84    | $\beta$ = 1.50  | $\beta_1$ = 1.95 | $\beta_1$ = 2.02 | $\beta$ = 1.84    | $\beta$ = 1.82    |                  |
| $\gamma$ = ?      |                 | $\beta_2$ = 1.95 | $\beta_2$ = 2.02 | $\gamma$ = ?      | $\gamma$ = 1.82   |                  |
| $\delta_1$ = 0.92 |                 | $\gamma$ = 1.52  | $\gamma$ = ?     | $\delta_1$ = 0.91 | $\delta_1$ = 0.92 |                  |
| $\delta_2$ = 0.92 |                 | $\delta$ = 1.72  | $\delta$ = ?     | $\delta_2$ = 0.91 | $\delta_2$ = 0.92 |                  |
|                   |                 | $\epsilon$ = ?   | $\epsilon$ = ?   |                   |                   |                  |



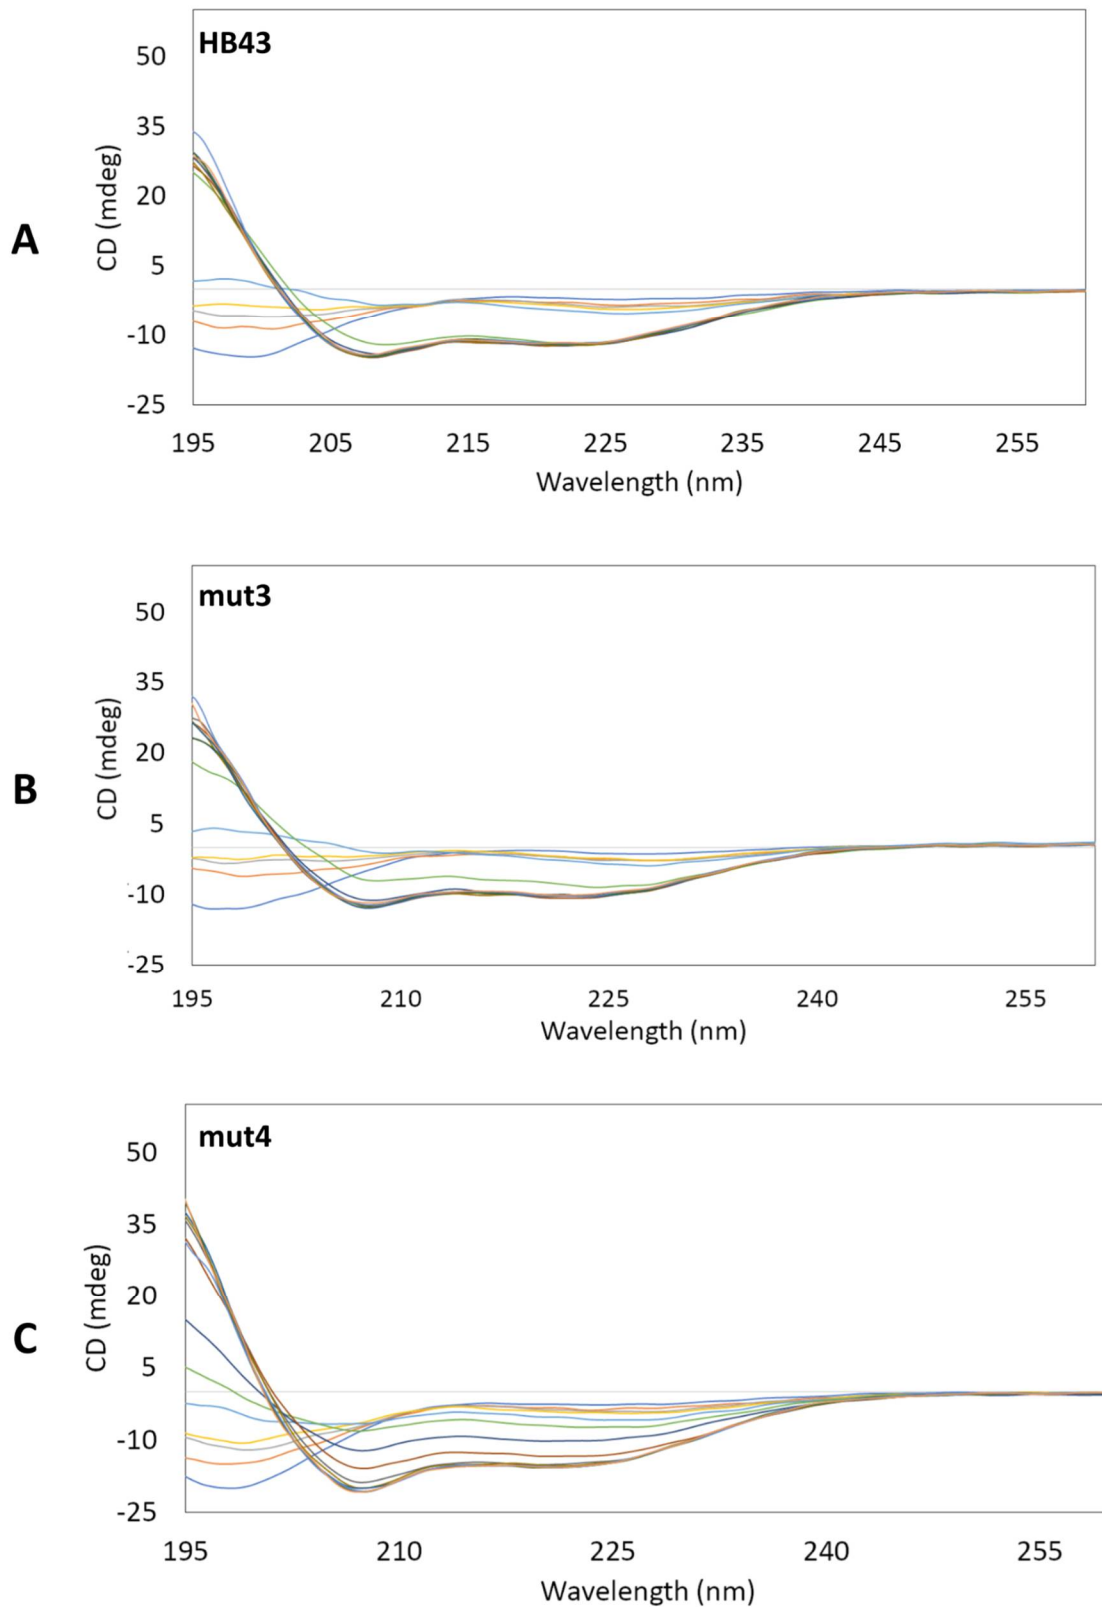

**Figure S5.** CD spectra of HB43 (**A**), *mut3* (**B**), and *mut4* (**C**) 10  $\mu$ M in 10 mM phosphate buffer at pH 6.6, in the absence (light green) and in the presence of increasing amounts of POPC/POPS SUVs (0,  $6.67 \times 10^6$ ,  $1.33 \times 10^5$ ,  $2.00 \times 10^5$ ,  $3.33 \times 10^5$ ,  $4.67 \times 10^5$ ,  $6.00 \times 10^5$ ,  $7.33 \times 10^5$ ,  $8.67 \times 10^5$ ,  $1.00 \times 10^4$ ,  $1.13 \times 10^4$ ,  $1.27 \times 10^4$ ,  $1.40 \times 10^4$ , and  $1.53 \times 10^4$  M).

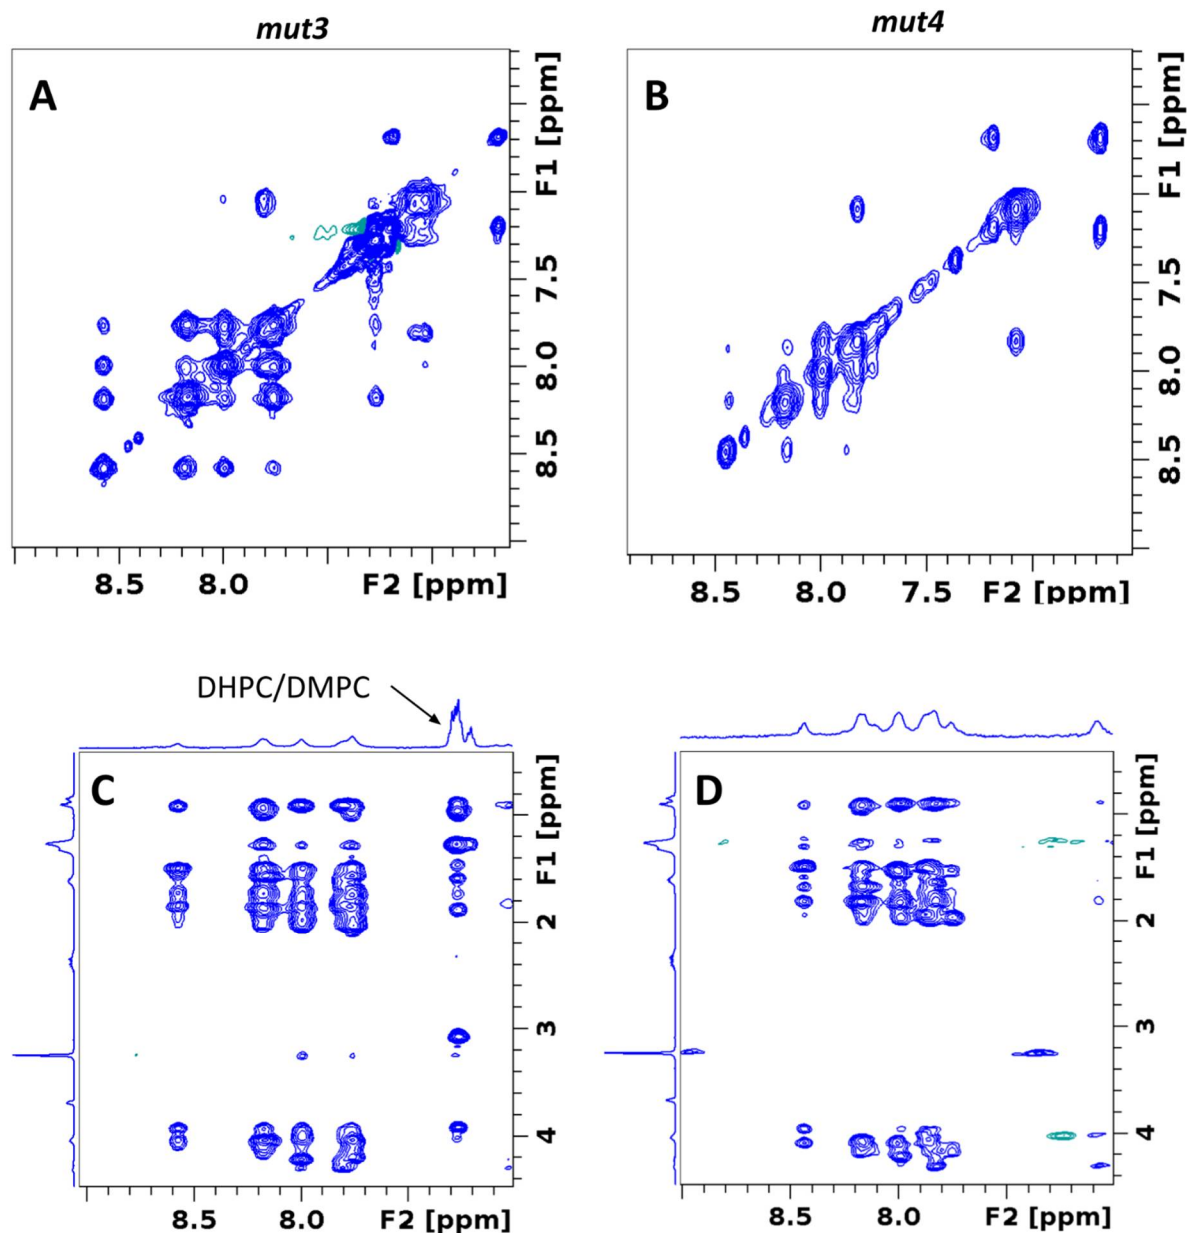

**Figure S6.** Amide and aromatic regions of  $^1\text{H}$ , $^1\text{H}$ -NOESY NMR spectrum of *mut3* and *mut4* 1.6 mM in 10 mM phosphate buffer at pH 6.6 (blue) and 310 K, in the presence of DMPC/DHPC isotropic bicelles at a total lipid concentration of 100 mM. (A,B) Amide region of *mut3* (A) and *mut4* (B) showing meaningful NOEs. (C,D) side-chain spectral regions of *mut3* (C) where aromatic signals of phenylalanine (Phe1) clearly show cross-peaks with the lipid chains of bicelles, a phenomenon not observed for *mut4* (D) due to the absence of this residue.

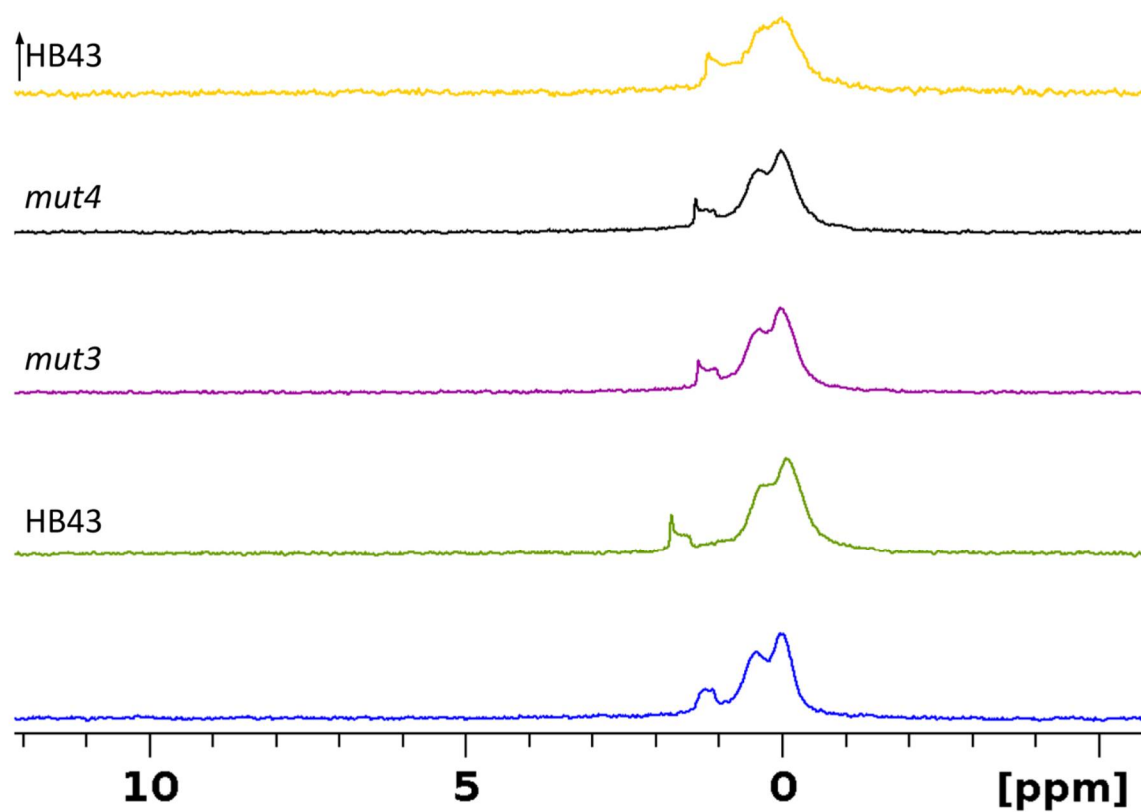

**Figure S7.** MAS  $^{31}\text{P}$  spectra of POPC/POPS (1:1) liposomes in the absence (blue) and the presence of HB43 (green), *mut3* (magenta), *mut4* (black), and a more concentrated sample of HB43 (yellow).

***mut3***

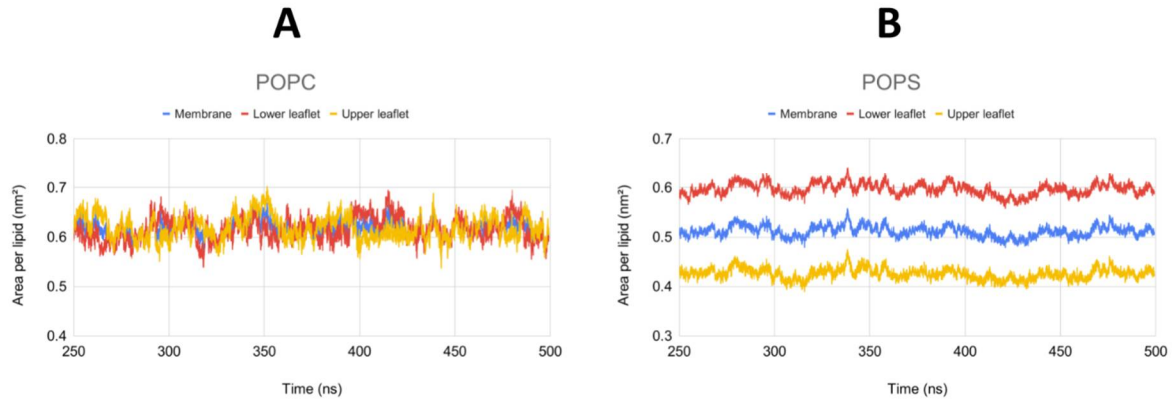

***mut4***

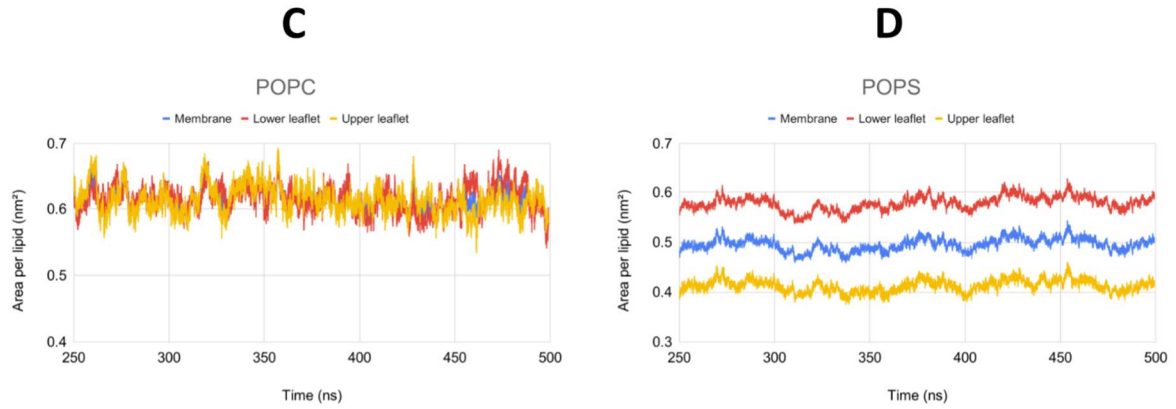

**Figure S8.** Area per lipid (nm<sup>2</sup>) in bilayers containing POPC and POPS as calculated from MD simulations in the presence of eight peptides of *mut3* (A,B) and *mut4* (C,D). The average value is shown in blue, while the upper and lower leaflet are shown in yellow and red, respectively.

***mut3***

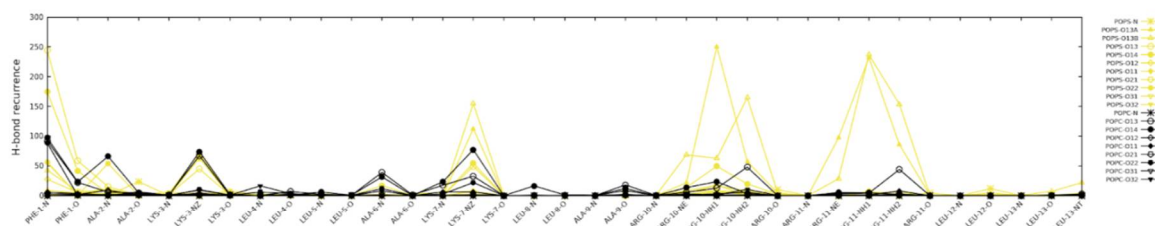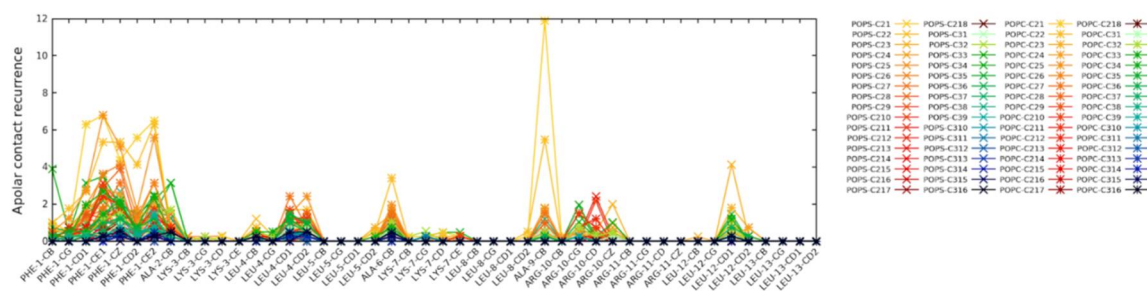

***mut4***

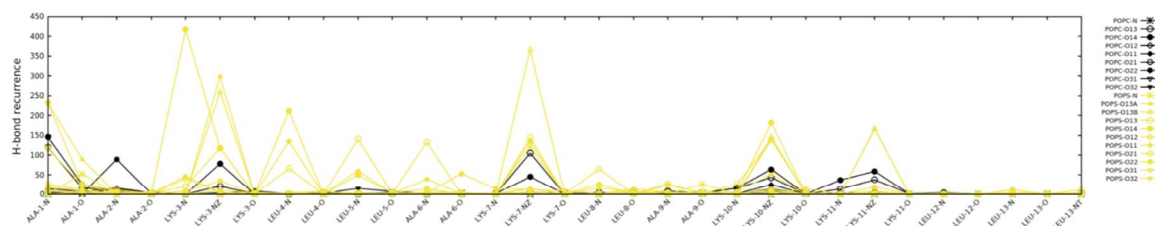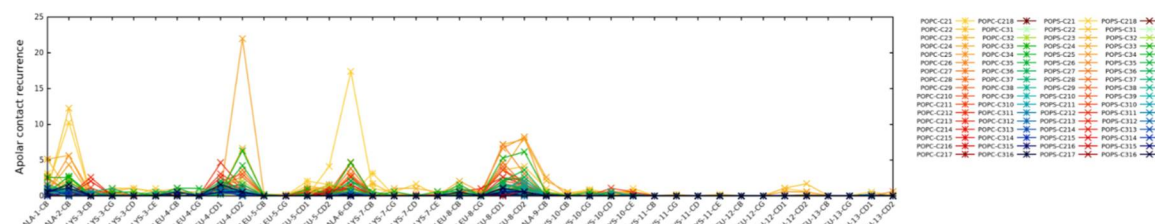

**Figure S9.** Occurrence of polar atom contacts (H-bonds and salt bridges) and van der Waals contacts between *mut3* (**top**), *mut4* (**bottom**), and POPC/POPS bilayers calculated along MD simulation trajectories.



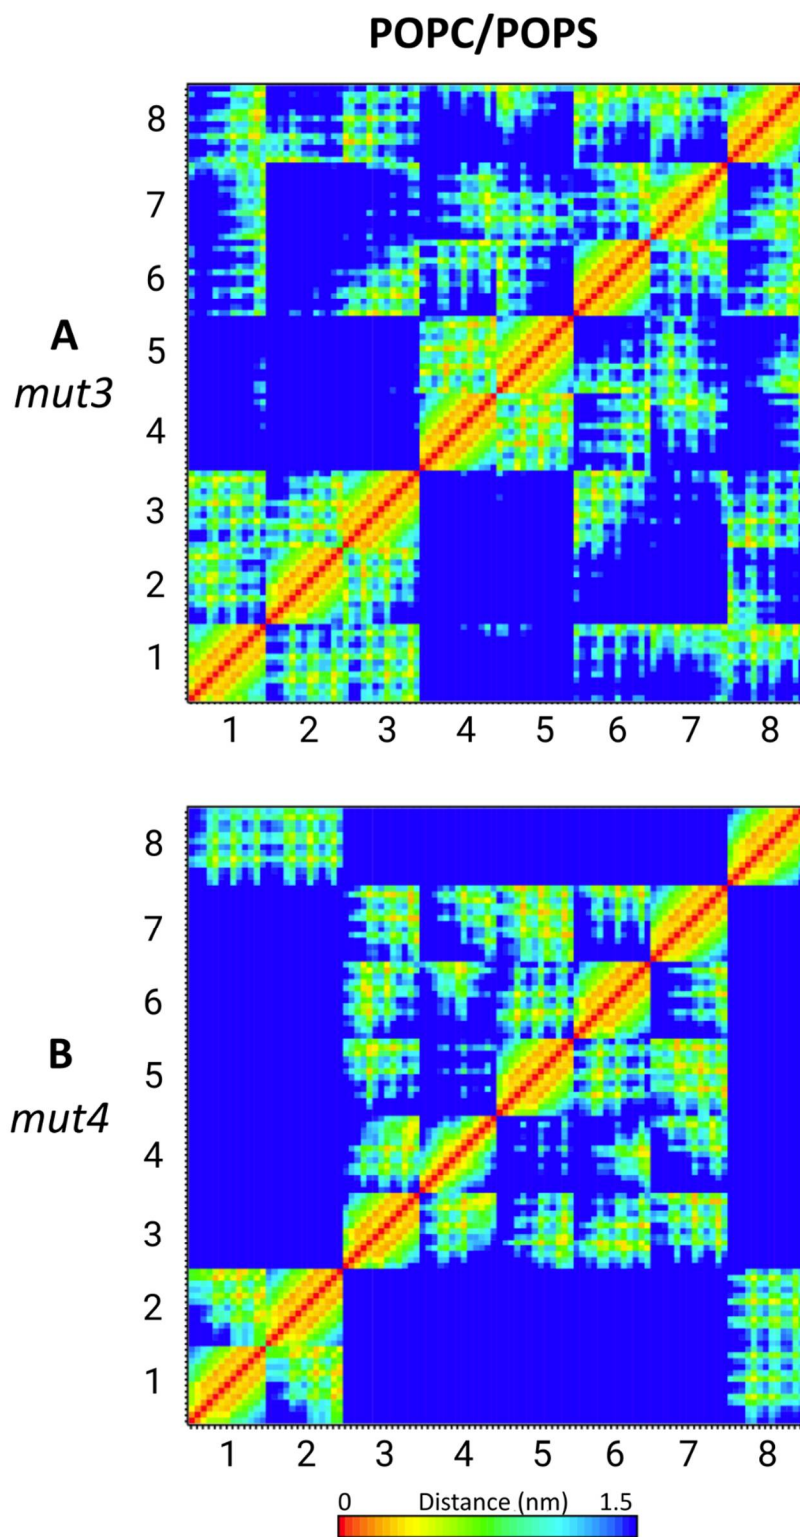

**Figure S10.** Contact maps in simulated POPC/POPS systems when eight peptides of *mut3* (**A**) and *mut4* (**B**) are present.

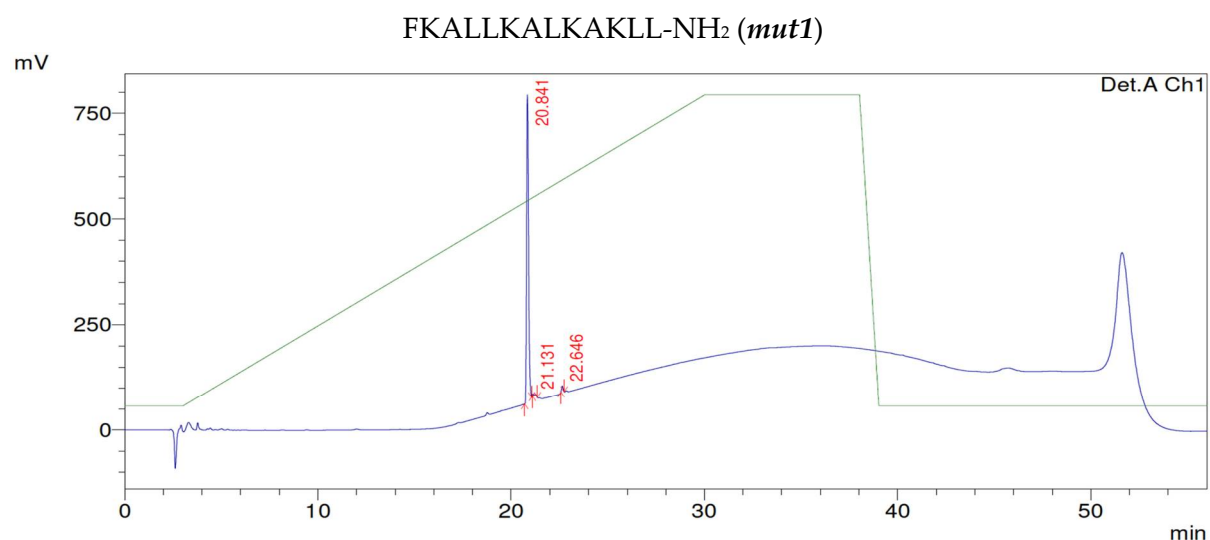

Detector A Ch1 210nm

| Peak Purity Index | Ret. Time | Area    | Height | Area %  | Height % |
|-------------------|-----------|---------|--------|---------|----------|
|                   | 20.841    | 5065200 | 725793 | 97.472  | 97.346   |
|                   | 21.131    | 52512   | 5500   | 1.011   | 0.738    |
|                   | 22.646    | 78835   | 14284  | 1.517   | 1.916    |
|                   |           | 5196547 | 745577 | 100.000 | 100.000  |

**Figure S11.** Analytical purity of *mut1*. HPLC C12 column (Phenomenex® C12, Jupiter 4  $\mu$  Proteo, 90 Å, 250  $\times$  4.6 mm) using a mixture of aqueous 0.1% (*v/v*) TFA (**A**) and 0.1% (*v/v*) TFA in acetonitrile (**B**) as the mobile phase (flow rate of 1 mL/min) and employing UV detection at 210 nm.

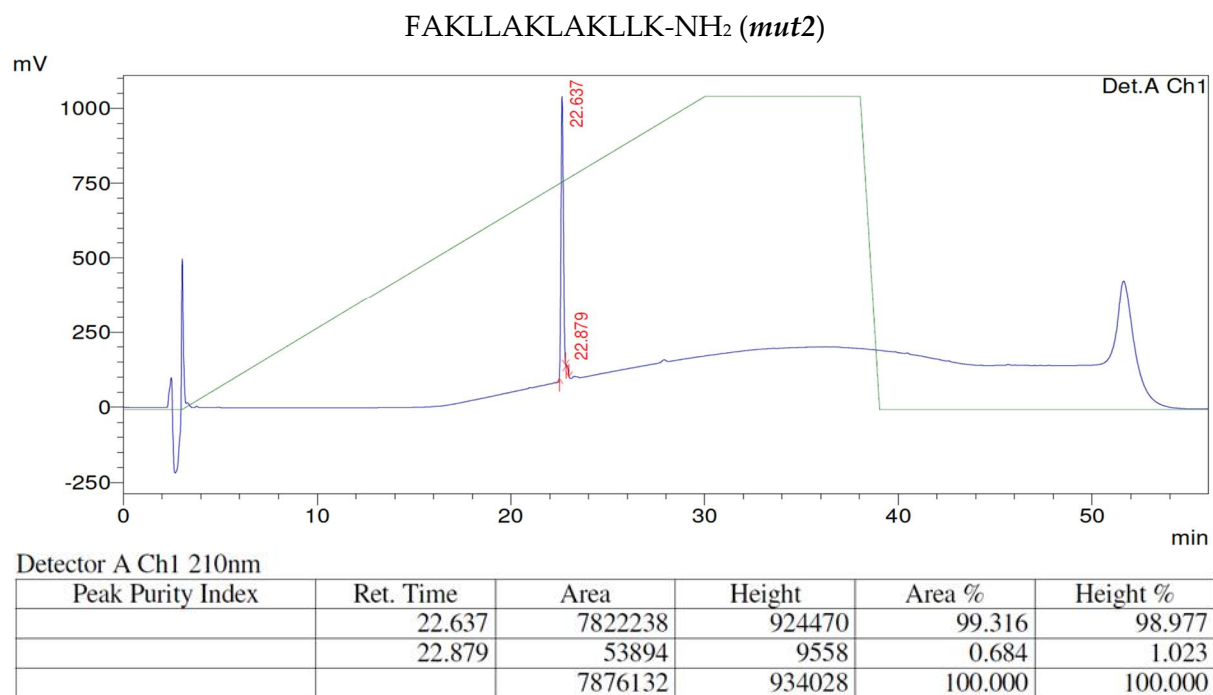

**Figure S12.** Analytical purity of *mut2*. HPLC C12 column (Phenomenex® C12, Jupiter 4  $\mu$  Proteo, 90 Å, 250  $\times$  4.6 mm) using a mixture of aqueous 0.1% (*v/v*) TFA (**A**) and 0.1% (*v/v*) TFA in acetonitrile (**B**) as the mobile phase (flow rate of 1 mL/min) and employing UV detection at 210 nm.

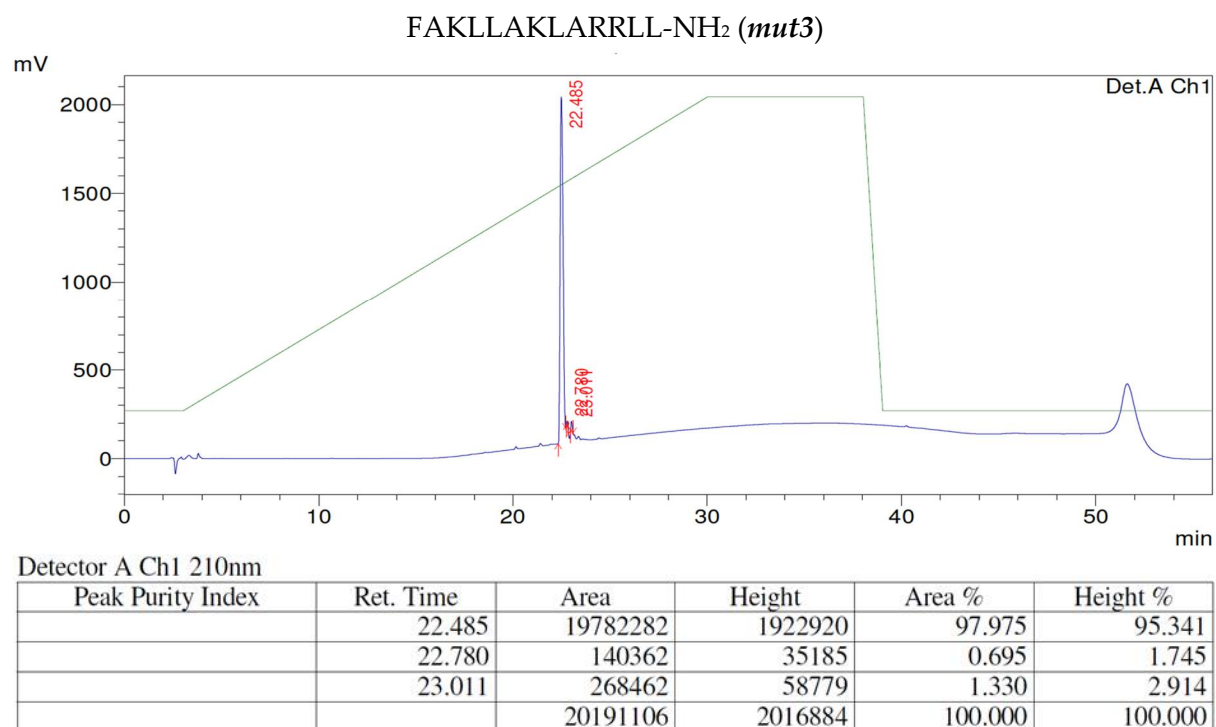

**Figure S13.** Analytical purity of *mut3*. HPLC C12 column (Phenomenex® C12, Jupiter 4  $\mu$  Proteo, 90 Å, 250  $\times$  4.6 mm) using a mixture of aqueous 0.1% (*v/v*) TFA (**A**) and 0.1% (*v/v*) TFA in acetonitrile (**B**) as the mobile phase (flow rate of 1 mL/min) and employing UV detection at 210 nm.

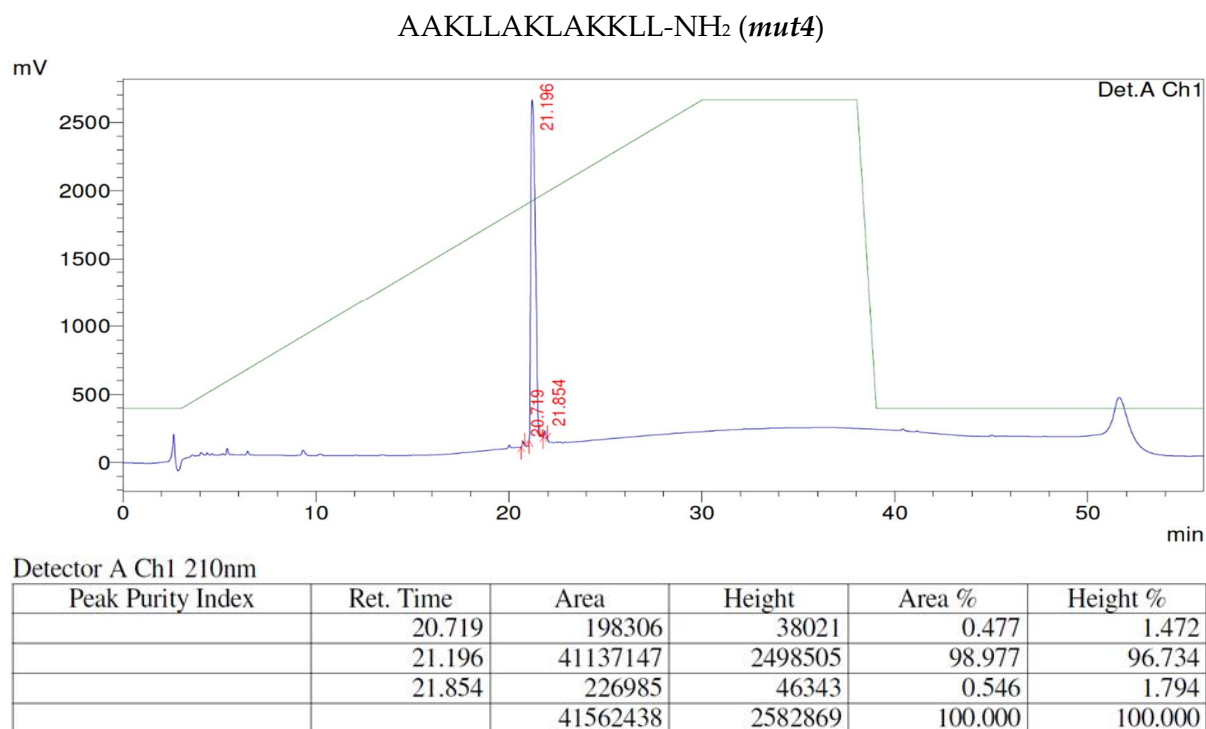

**Figure S14.** Analytical purity of *mut4*. HPLC C12 column (Phenomenex® C12, Jupiter 4  $\mu$  Proteo, 90 Å, 250  $\times$  4.6 mm) using a mixture of aqueous 0.1% (*v/v*) TFA (A) and 0.1% (*v/v*) TFA in acetonitrile (B) as the mobile phase (flow rate of 1 mL/min) and employing UV detection at 210 nm.
